# Supplementary material for: Preparation and characterization of alginate–N-2-hydroxypropyl trimethyl ammonium chloride chitosan microcapsules loaded with patchouli oil
Source: Royal Society of Chemistry journal article supplement (doi:10.1039/c4ra14844d), 2015-01-01
Supplement: c4ra14844d1.pdf [file c4ra14844d1.pdf]

## Supporting Information

### **Preparation and characterization of alginate - *N*-2-hydroxypropyl trimethyl ammonium chloride chitosan microcapsules loaded with patchouli oil**

Minjie Chen<sup>1</sup>, Jiayi Liu<sup>1</sup>, Yingju Liu<sup>1,\*</sup>, Cheng Guo<sup>1</sup>, Zhuohong Yang<sup>1,\*</sup>, Hong Wu<sup>2</sup>

<sup>1</sup>Institute of Biomaterials, College of Sciences, South China Agriculture University,

Guangzhou 510642, P. R. China

<sup>2</sup> College of Life Sciences, South China Agriculture University, Guangzhou 510642, P.

R. China

---

\* To whom correspondence should be addressed. Tel: 86-020-85280325; Fax: 86-020-85282366. E-mail: liuyingju@hotmail.com; yangzhuohong@aliyun.com

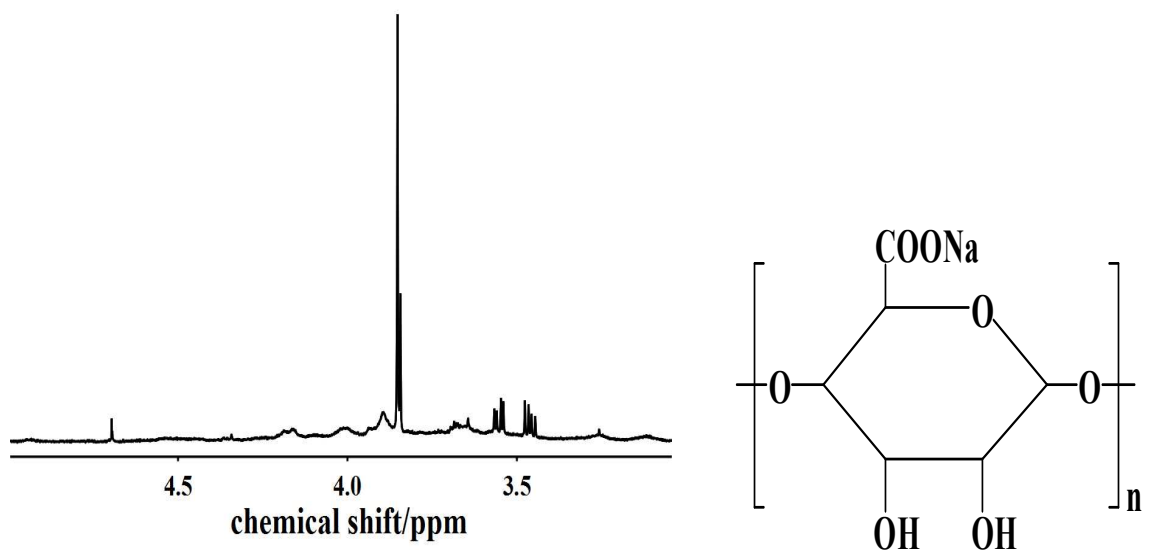

(A)

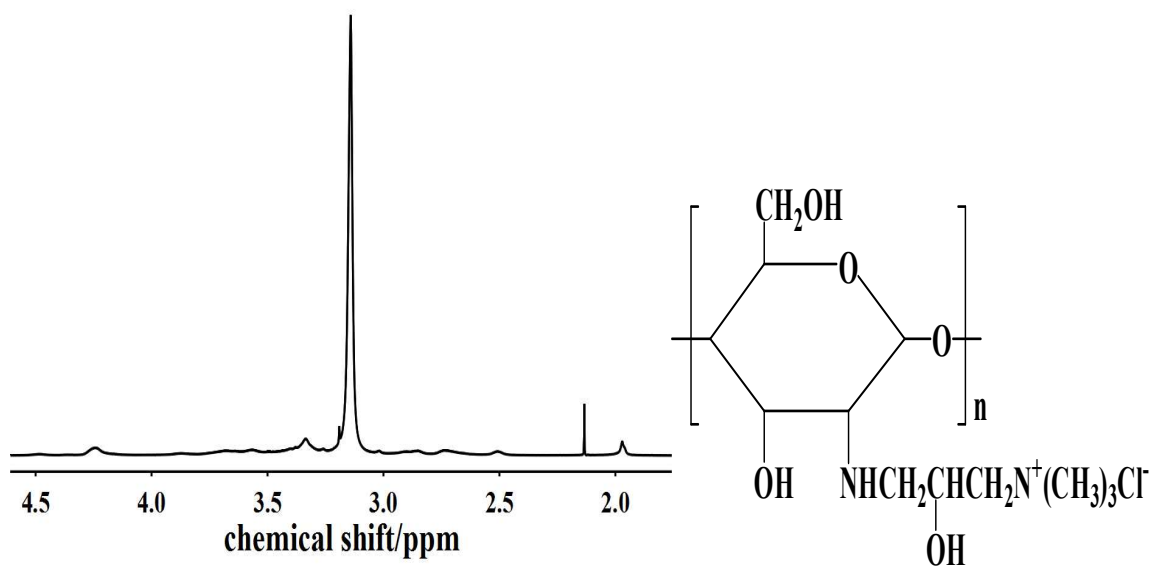

(B)

Fig. S1. The proton nuclear magnetic resonance ( $^1\text{H}$  NMR) spectra and formula of Alg (A) and HACC (B)

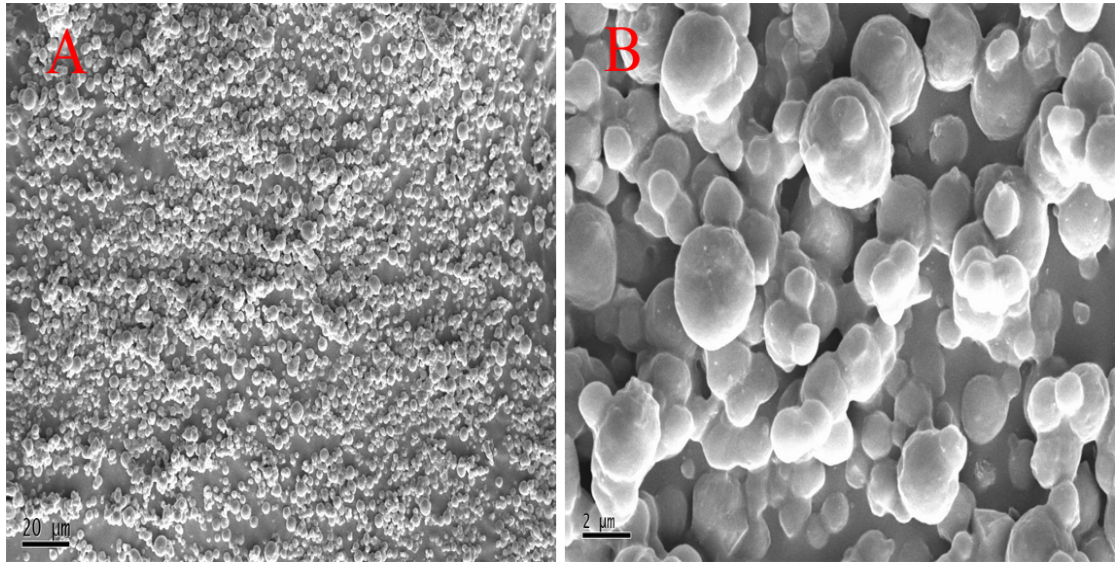

Fig. S2. SEM images of microcapsules after a month(A) and three months(B)
